# Supplementary material for: Evaluating the Potential for Smoke from Stubble Burning to Taint Grapes and Wine
Source: MDPI journal article supplement (doi:10.3390/molecules26247540), 2021-12-13
Supplement: s1 [file s1]

# Evaluating the Potential for Smoke from Stubble Burning to Taint Grapes and Wine

Kerry Wilkinson <sup>1,\*</sup>, Renata Ristic <sup>1</sup>, Imogen McNamara <sup>1</sup>, Beth Loveys <sup>1</sup>, WenWen Jiang <sup>2</sup> and Mark Krstic <sup>2</sup>

<sup>1</sup> Department of Wine Science, Waite Research Institute, The University of Adelaide, PMB 1, Adelaide, SA 5064, Australia; renata.ristic@adelaide.edu.au (R.R.); imogen.mcnamara@hotmail.com (I.M.); beth.loveys@adelaide.edu.au (B.L.)

<sup>2</sup> The Australian Wine Research Institute, PO Box 197, Adelaide, SA 5064, Australia; maddy.jiang@awri.com.au (W.J.); mark.krstic@awri.com.au (M.K.)

\* Correspondence: kerry.wilkinson@adelaide.edu.au (K.W.); Tel: +61-8-8313-7360

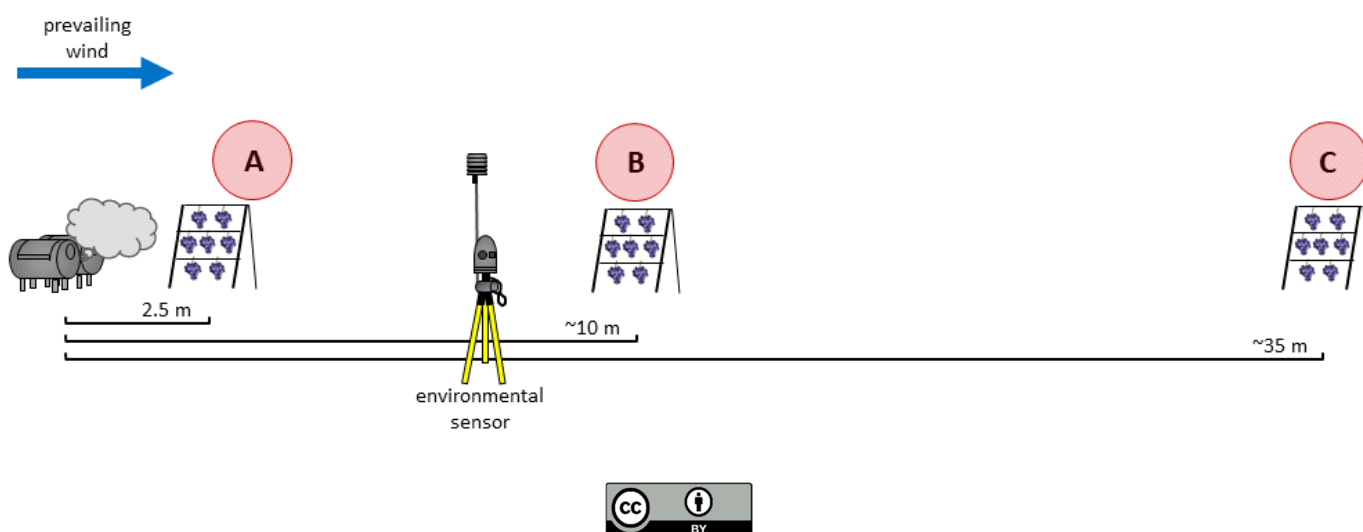

Copyright: © 2021 by the authors. Licensee MDPI, Basel, Switzerland. This article is an open access article distributed under the terms and conditions of the Creative Commons Attribution (CC BY) license (<https://creativecommons.org/licenses/by/4.0/>).

**Figure S1.** Schematic of preliminary field trial, indicating relative locations of excised Shiraz grape bunches and the environmental sensor.

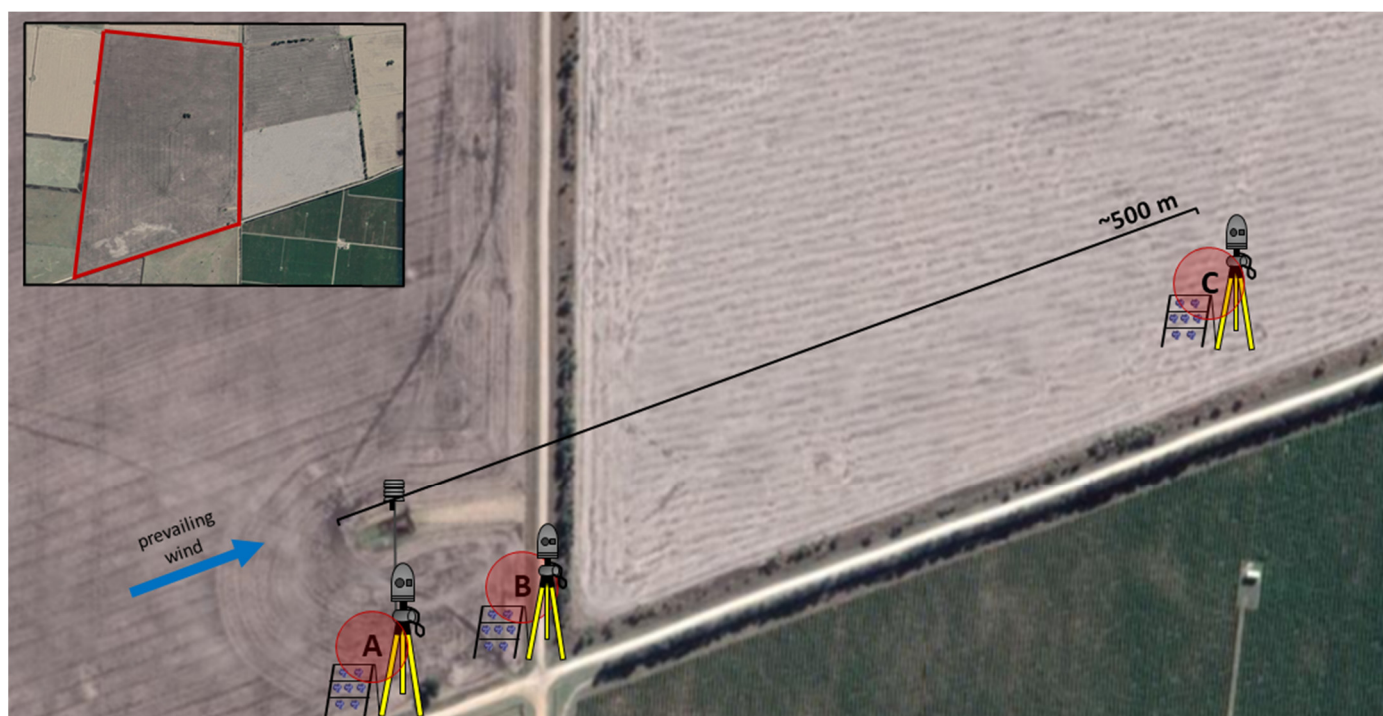

**Figure S2.** Schematic of pea stubble burn, indicating relative locations of excised Cabernet Sauvignon grape bunches and environmental sensors within the pea paddock (inset); map sourced from *Google Earth*, [earth.google.com/web/](http://earth.google.com/web/).

**Table S1.** Concentrations of volatile phenols in control and smoke-affected Shiraz grapes ( $\mu\text{g/kg}$ ) and wines ( $\mu\text{g/L}$ ).

|        |               | Guaiacol | 4-Methyl<br>Guaiacol | <i>o</i> -Cresol | <i>m</i> -Cresol | <i>p</i> -Cresol | Syringol | 4-Methyl<br>Syringol |
|--------|---------------|----------|----------------------|------------------|------------------|------------------|----------|----------------------|
| Grapes | Control       | 6.0 fg   | nd                   | 1.0 f            | nd               | nd               | nd       | nd                   |
|        | t = 1         | 8.0 e    | nd                   | 2.0 e            | nd               | nd               | 8.0 e    | nd                   |
|        | t = 2         | 9.3 d    | 1.0 c                | 3.0 d            | nd               | nd               | 13.7 d   | nd                   |
|        | Smoke A t = 3 | 11.3 c   | 1.0 c                | 4.0 c            | 1.0 c            | nd               | 17.7 c   | nd                   |
|        | t = 4         | 12.7 b   | 2.0 b                | 6.0 b            | 1.7 b            | nd               | 25.0 b   | 2.3 b                |
|        | t = 5         | 16.3 a   | 2.3 a                | 7.3 a            | 2.0 a            | nd               | 34.0 a   | 3.3 a                |
|        | t = 1         | 5.3 gh   | nd                   | 1.0 f            | nd               | nd               | 3.7 h    | nd                   |
|        | t = 2         | 5.7 g    | nd                   | 1.0 f            | nd               | nd               | 5.0 g    | nd                   |
|        | Smoke B t = 3 | 5.3 gh   | nd                   | 1.0 f            | nd               | nd               | 6.0 fg   | nd                   |
|        | t = 4         | 6.0 fg   | nd                   | 1.3 f            | nd               | nd               | 7.0 ef   | nd                   |
|        | t = 5         | 6.7 f    | nd                   | 2.0 e            | nd               | nd               | 7.0 ef   | nd                   |
|        | t = 1         | 5.0 g    | nd                   | 1.0 f            | nd               | nd               | nd       | nd                   |
|        | t = 2         | 5.0 g    | nd                   | 1.0 f            | nd               | nd               | 2.0 hi   | nd                   |
|        | Smoke C t = 3 | 5.0 g    | nd                   | 1.0 f            | nd               | nd               | 2.0 hi   | nd                   |
|        | t = 4         | 5.3 g    | nd                   | 1.0 f            | nd               | nd               | 2.0 hi   | nd                   |
|        | t = 5         | 5.0 g    | nd                   | 1.0 f            | nd               | nd               | 2.7 hi   | nd                   |
|        | P             | <0.001   | <0.001               | <0.001           | <0.001           | –                | <0.001   | <0.001               |
| Wine   | Control       | 14.3 b   | nd                   | 1.0 c            | nd               | nd               | 6.7 d    | nd                   |
|        | Smoke A       | 30.7 a   | 3.0                  | 6.6 a            | 9.3 a            | 2.0 a            | 39.0 a   | 4                    |
|        | Smoke B       | 15.3 b   | nd                   | 2.0 b            | 2.0 b            | 1.0 b            | 12.9 b   | nd                   |
|        | Smoke C       | 14.0 b   | nd                   | 1.0 c            | nd               | nd               | 9.7 c    | nd                   |
|        | P             | <0.001   | –                    | <0.001           | <0.001           | <0.001           | <0.001   | –                    |

Values are means of three replicates ( $n = 3$ ); nd = not detected. Different letters within columns indicate statistical significance for grapes ( $P \leq 0.05$ , two-way ANOVA; i.e., by treatment and time, where t denotes hours of smoke exposure) and wine ( $P \leq 0.05$ , one-way ANOVA).

**Table S2.** Concentrations of selected volatile phenol glycosides ( $\mu\text{g/L}$ ) in of control and smoke-affected Shiraz wines.

|         | GuR    | 4MGR   | CrR    | PhR   | SyrGG | 4MSGG |
|---------|--------|--------|--------|-------|-------|-------|
| Control | 11.2 b | 2.8 b  | 4.0 c  | 1.2 c | nd    | nd    |
| Smoke A | 13.0 a | 3.7 a  | 6.1 a  | 1.8 a | 2.4   | nd    |
| Smoke B | 13.5 a | 3.9 a  | 5.0 b  | 1.6 b | nd    | nd    |
| Smoke C | 12.7 a | 3.6 a  | 4.9 b  | 1.5 b | nd    | nd    |
| P       | 0.015  | <0.001 | <0.015 | 0.007 | –     | –     |

Values are means of three replicates ( $n = 3$ ) measured as syringol glucose-glucoside (gentiobioside) equivalents; nd = not detected. Different letters within columns indicate statistical significance ( $P \leq 0.05$ , one-way ANOVA). Gu = guaiacol; 4MG = 4-methylguaiacol; Cr = cresol; Ph = phenol; Syr = syringol; 4MS = 4-methylsyringol; GG = glucose-glucoside; R = rutinoside.

**Table S3.** Basic composition of control and smoke-affected Shiraz wines.

|                      | Control | Smoke A | Smoke B | Smoke C | P      |
|----------------------|---------|---------|---------|---------|--------|
| alcohol (% abv)      | 15.0 c  | 15.2 c  | 15.6 b  | 16.1 a  | <0.001 |
| residual sugar (g/L) | 0.7 a   | 0.5 a   | 0.5 a   | 0.1 b   | 0.032  |
| pH                   | 3.8 b   | 3.9 a   | 3.8 b   | 3.9 a   | <0.001 |
| TA (g/L)             | 6.67    | 6.73    | 7.10    | 6.67    | ns     |
| VA (g/L)             | 0.47    | 0.51    | 0.57    | 0.39    | ns     |
| malic acid (g/L)     | 1.9 a   | 1.8 a   | 1.6 b   | 1.6 b   | 0.009  |
| wine color (au)      | 10.6 b  | 11.6 ab | 11.7 ab | 12.6 a  | 0.019  |
| wine hue             | 0.53    | 0.53    | 0.52    | 0.55    | ns     |
| phenolics (au)       | 46.7 c  | 48.7 bc | 49.7 b  | 52.7 a  | 0.006  |

Values are means of three replicates ( $n = 3$ ). Different letters within rows indicate statistical significance ( $P \leq 0.05$ , one-way ANOVA).

**Table S4.** Mean intensity ratings for sensory attributes of control and smoke-affected Shiraz wines.

|                    | Control | Smoke A | Smoke B | Smoke C | P      |
|--------------------|---------|---------|---------|---------|--------|
| fruit aroma        | 3.94 a  | 2.60 b  | 3.90 a  | 4.05 a  | <0.001 |
| smoke aroma        | 2.60 c  | 4.87 a  | 3.19 b  | 2.81 bc | <0.001 |
| cold ash aroma     | 2.53 b  | 4.39 a  | 2.94 b  | 2.65 b  | <0.001 |
| earthy aroma       | 3.11    | 3.50    | 3.32    | 3.08    | ns     |
| medicinal aroma    | 3.06 b  | 4.15 a  | 2.68 b  | 2.66 b  | <0.001 |
| burnt rubber aroma | 2.16 c  | 4.08 a  | 2.86 b  | 2.05 c  | <0.001 |
| fruit flavor       | 3.92 a  | 2.60 b  | 3.73 a  | 3.90 a  | <0.001 |
| smoky flavor       | 2.65 c  | 5.10 a  | 3.42 b  | 2.86 c  | <0.001 |
| medicinal flavor   | 2.76 b  | 4.00 a  | 2.82 b  | 2.65 b  | <0.001 |
| ashy aftertaste    | 2.73 bc | 4.92 a  | 3.29 b  | 2.68 c  | <0.001 |
| woody aftertaste   | 3.29 b  | 4.03 a  | 3.60 ab | 3.32 b  | 0.034  |
| metallic           | 2.66 b  | 3.32 a  | 3.03 ab | 2.55 b  | 0.025  |
| acidity            | 4.31    | 4.24    | 4.29    | 4.27    | ns     |
| hotness            | 3.79    | 3.87    | 4.08    | 4.16    | ns     |
| bitterness         | 3.65    | 3.73    | 3.48    | 3.32    | ns     |
| astringency        | 4.02    | 3.84    | 3.82    | 3.86    | ns     |

Values are means of one blended wine per treatment presented to 62 judges. Different letters within rows indicate statistical significance ( $P \leq 0.05$ , two-way ANOVA).

**Table S5.** Concentrations of selected volatile phenol glycosides ( $\mu\text{g/L}$ ) in control and smoke-affected Cabernet Sauvignon wines.

|         | GuPG   | GuR | 4MGR | CrPG | CrR | PhG   | PhPG | PhR   | SyrPG | SyrGG | 4MSGG |
|---------|--------|-----|------|------|-----|-------|------|-------|-------|-------|-------|
| Control | 7.2 a  | 1.0 | 1.8  | 3.6  | 1.7 | 2.6 b | 10.8 | 1.8 a | 1.6   | 1.6   | nd    |
| Smoke A | 5.5 c  | nd  | nd   | 2.7  | 1.7 | 3.7 a | 9.7  | 1.4 b | 1.4   | 1.4   | nd    |
| Smoke B | 6.4 b  | nd  | 1.6  | 3.2  | 1.5 | 2.6 b | 10.2 | 1.3 b | 1.4   | 1.4   | nd    |
| Smoke C | 7.0 ab | nd  | 1.5  | 3.2  | 1.8 | 2.5 b | 10.5 | 1.7 a | 1.5   | 1.5   | nd    |

P 0.003 ns ns ns ns 0.011 ns 0.014 ns ns –

Values are means of three replicates ( $n = 3$ ) measured as syringol glucose-glucoside (gentiobioside) equivalents; nd = not detected. Different letters within columns indicate statistical significance ( $P \leq 0.05$ , one-way ANOVA); ns = not significant. Gu = guaiacol; 4MG = 4-methylguaiacol; Cr = cresol; Ph = phenol; Syr = syringol; 4MS = 4-methylsyringol; PG = pentose-glucoside; R = rutinoid; G = glucoside; GG = glucose-glucoside.

**Table S6.** Basic composition of control and smoke-affected Cabernet Sauvignon wines.

|                      | Control | Smoke A | Smoke B | Smoke C | P      |
|----------------------|---------|---------|---------|---------|--------|
| alcohol (% abv)      | 14.4 a  | 13.0 b  | 14.1 a  | 14.4 a  | 0.003  |
| residual sugar (g/L) | 0.6     | 0.4     | 0.5     | 0.5     | ns     |
| pH                   | 3.4 a   | 3.3 a   | 3.4 a   | 3.4 a   | 0.049  |
| TA (g/L)             | 7.33 b  | 7.87 a  | 7.47 b  | 7.50 ab | 0.045  |
| VA (g/L)             | 0.62 a  | 0.50 b  | 0.56 b  | 0.64 a  | 0.002  |
| malic acid (g/L)     | 2.2 b   | 2.8 a   | 2.2 b   | 2.2 b   | <0.001 |
| wine color (au)      | 11.2 a  | 8.6 b   | 9.7 b   | 11.4 a  | 0.003  |
| wine hue             | 0.52    | 0.53    | 0.52    | 0.50    | ns     |
| phenolics (au)       | 45.0 a  | 36.3 b  | 40.3 b  | 45.7 a  | 0.002  |

Values are means of three replicates ( $n = 3$ ), with the exception of alcohol, residual sugar, pH, TA and VA for Smoke C wine, for which values are means of two replicates ( $n = 2$ ). Different letters within rows indicate statistical significance ( $P \leq 0.05$ , one-way ANOVA).

**Table S7.** Mean intensity ratings for sensory attributes of control and smoke-affected Cabernet Sauvignon wines.

|                     | Control | Smoke A | Smoke B | Smoke C | P     |
|---------------------|---------|---------|---------|---------|-------|
| fruit aroma         | 3.94    | 3.67    | 3.87    | 3.77    | ns    |
| smoke aroma         | 1.79 b  | 2.48 a  | 1.96 b  | 1.96 b  | 0.034 |
| cold ash aroma      | 1.79    | 2.17    | 1.67    | 1.77    | ns    |
| earthy aroma        | 2.62    | 2.92    | 2.40    | 2.37    | ns    |
| medicinal aroma     | 2.06    | 2.12    | 1.52    | 1.73    | ns    |
| burnt rubber aroma  | 1.31    | 1.12    | 1.00    | 0.88    | ns    |
| fruit flavor        | 3.77    | 3.54    | 3.67    | 3.42    | ns    |
| smoky flavor        | 1.88    | 2.37    | 1.79    | 1.92    | ns    |
| medicinal flavor    | 1.71 ab | 2.06 a  | 1.37 b  | 1.69 ab | 0.008 |
| burnt rubber flavor | 0.71 b  | 1.21 a  | 0.79 b  | 0.71 b  | 0.004 |
| ashy aftertaste     | 1.92    | 2.44    | 1.67    | 1.98    | ns    |
| woody aftertaste    | 2.37    | 2.37    | 2.15    | 2.12    | ns    |
| drying              | 3.79    | 3.48    | 3.56    | 3.77    | ns    |
| metallic            | 1.42 ab | 1.81 a  | 1.17 b  | 1.52 ab | 0.034 |
| acidity             | 4.33    | 4.40    | 4.12    | 4.25    | ns    |
| hotness             | 3.21    | 3.02    | 3.13    | 3.48    | ns    |
| bitterness          | 2.98    | 3.12    | 2.87    | 3.10    | ns    |
| astringency         | 3.63    | 3.42    | 3.42    | 3.69    | ns    |

Values are means of one blended wine per treatment presented to 52 judges. Different letters within rows indicate statistical significance ( $P \leq 0.05$ , two-way ANOVA).

**Table S8.** Aroma and palate attributes used in sensory analysis.

| Attributes          | Definition                                                                                                                                         |
|---------------------|----------------------------------------------------------------------------------------------------------------------------------------------------|
| fruit aroma         | Intensity of the overall fruit aroma                                                                                                               |
| smoke aroma         | Perception of any type of smoke aroma, including smoked meat/bacon, toasty, charry, cigar-box, estery                                              |
| cold ash aroma      | Burnt aroma associate with ashes, including ashtray, tarry, campfire                                                                               |
| earthy aroma        | Any aroma associated with musty, dusty, wet-wood, barnyard, mushroom-like, dank, moldy, stagnant, stale                                            |
| medicinal aroma     | Aromatic characteristic of Band-Aids, disinfectant-like, including cleaning products, solvents, chemicals                                          |
| burnt rubber aroma  | Perception of burnt rubber-like aromas                                                                                                             |
| fruit flavor        | Intensity of the overall fruit flavor                                                                                                              |
| smoky flavor        | Perception of smoke flavor, including bacon and smoked meat                                                                                        |
| medicinal flavor    | Perception of medicinal flavors, including disinfectant-like, cleaning products and solvents                                                       |
| burnt rubber flavor | Perception of burnt rubber flavor                                                                                                                  |
| ashy aftertaste     | Length of taste associated with residue of ashtray perceived in the mouth after expectorating, including coal ash, ashtray, tarry, acrid, campfire |
| woody aftertaste    | Length of taste associated with woody residue, includes wood, oak, pencil shavings                                                                 |
| drying              | Intensity of drying, puckering mouthfeel                                                                                                           |
| metallic            | The ‘tinny’ flavor associated with metals                                                                                                          |
| acidity             | Intensity of sour/acid taste                                                                                                                       |
| hotness             | Intensity of warmth/heat due to ethanol                                                                                                            |
| bitterness          | Intensity of bitter taste, bitter aftertaste                                                                                                       |
| astringency         | Intensity of drying, puckering mouthfeel                                                                                                           |
